# Supplementary material
Source: MDPI journal article supplement (https://www.mdpi.com/2076-3263/6/2/29)

**Supplementary File S3:**

This file contains box-plots on the log<sub>10</sub> scale for selected metals (As, Cd, Co, Cr, Cu, Fe, Mo, Ni, Pb, V, and Zn) separated by major stratigraphic units. The left-hand column contains plots for all samples in the study (single Precambrian point excluded). The right-hand column contains plots for the same metals, but for only the “matrix” sample set. Colors correspond to those used in Figures 2 and 4.

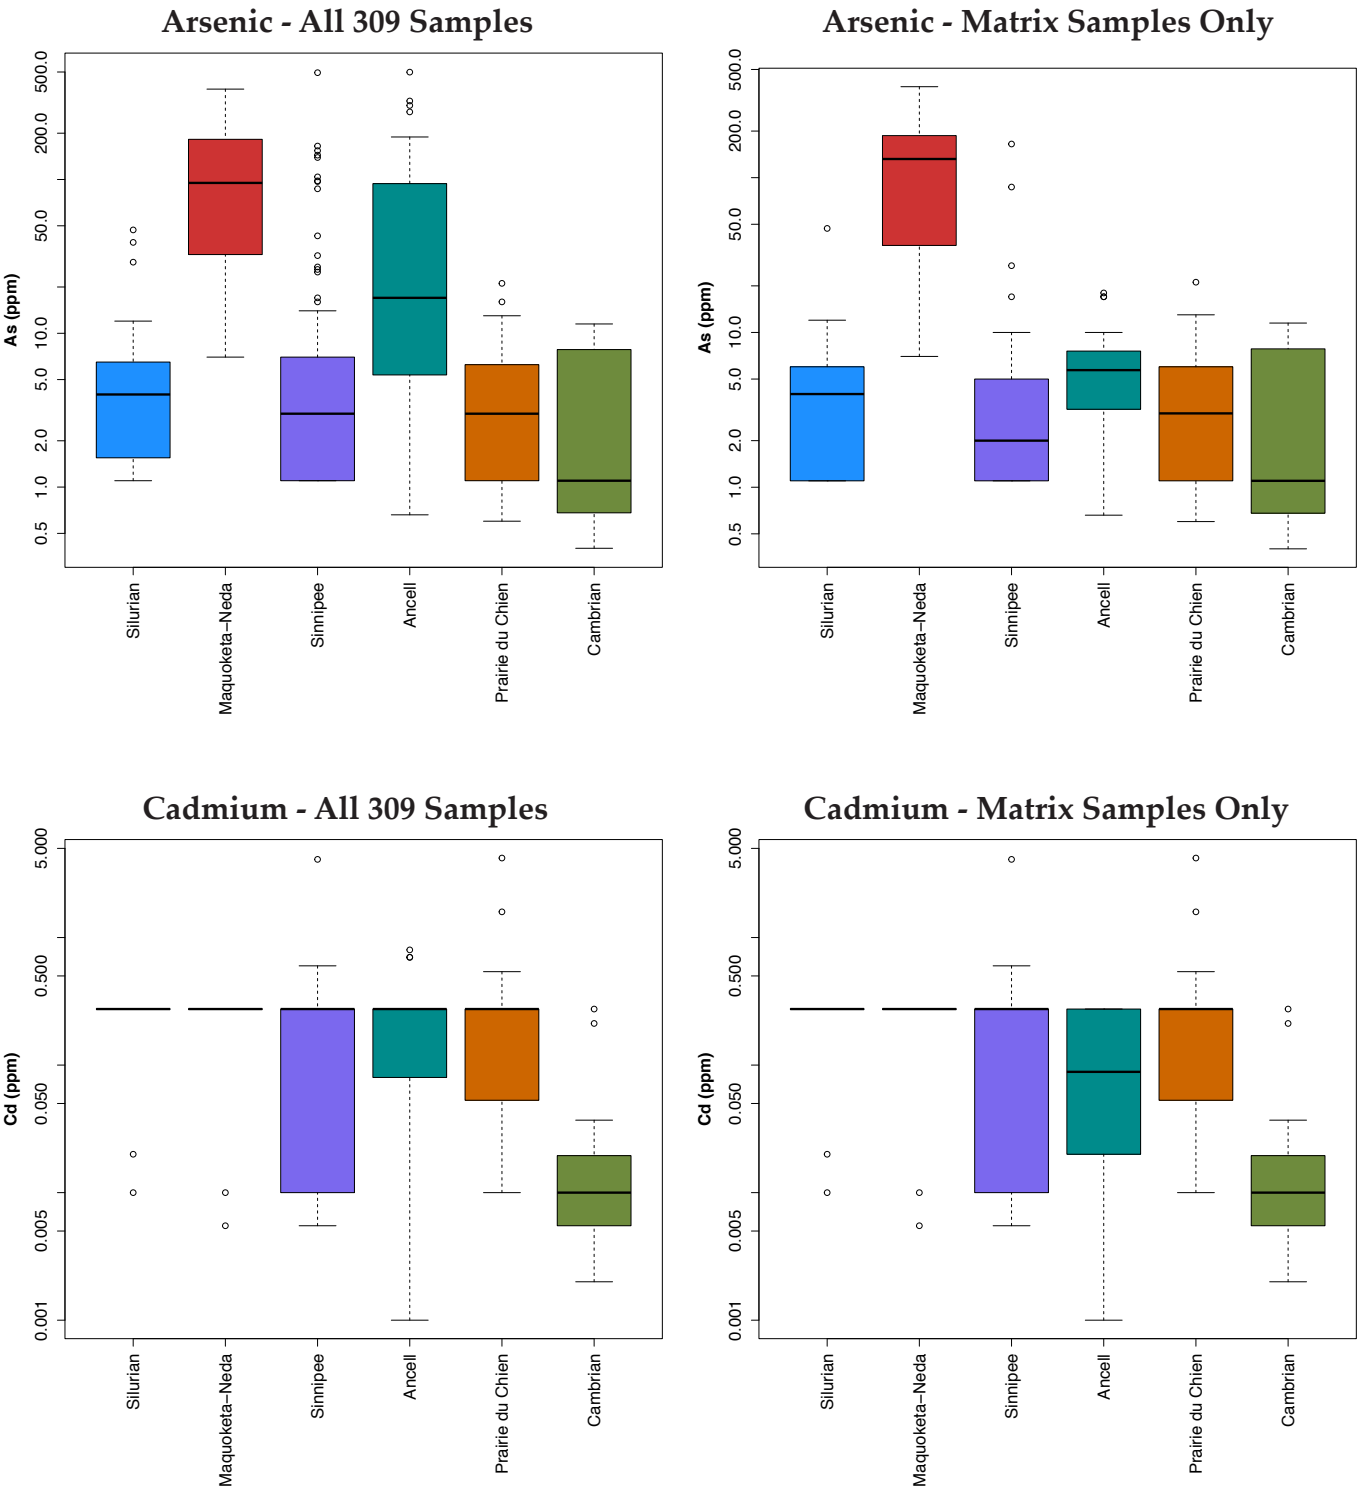

Cobalt - All 309 Samples

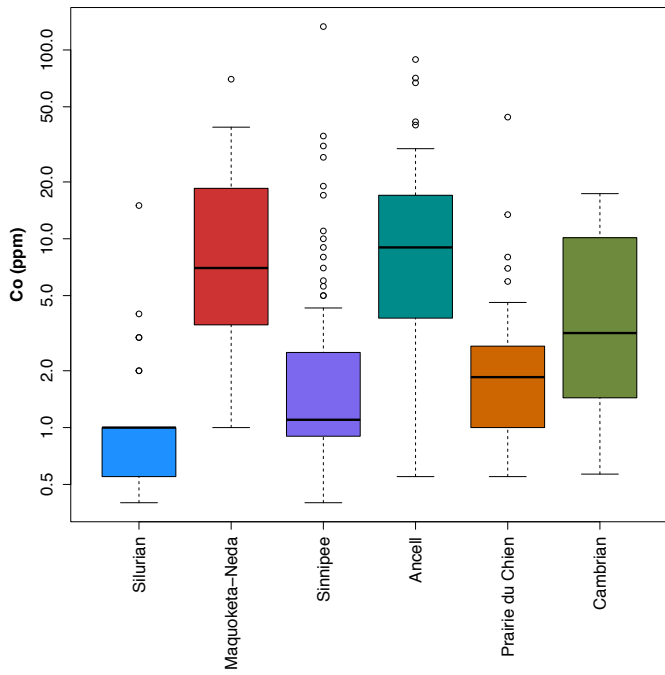

Cobalt - Matrix Samples Only

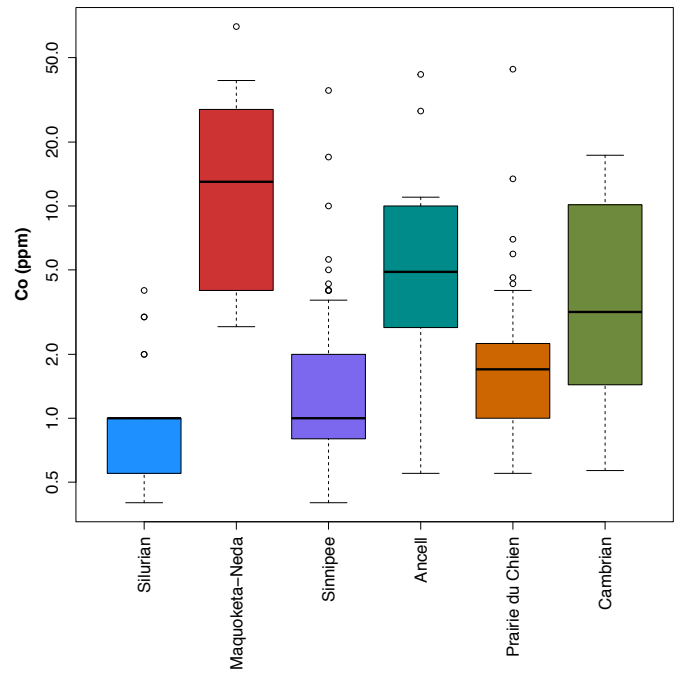

Chromium - All 309 Samples

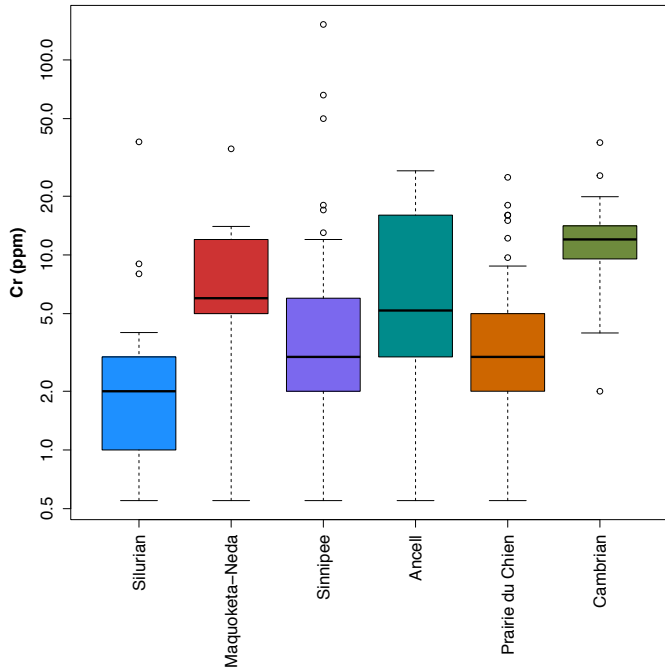

Chromium - Matrix Samples Only

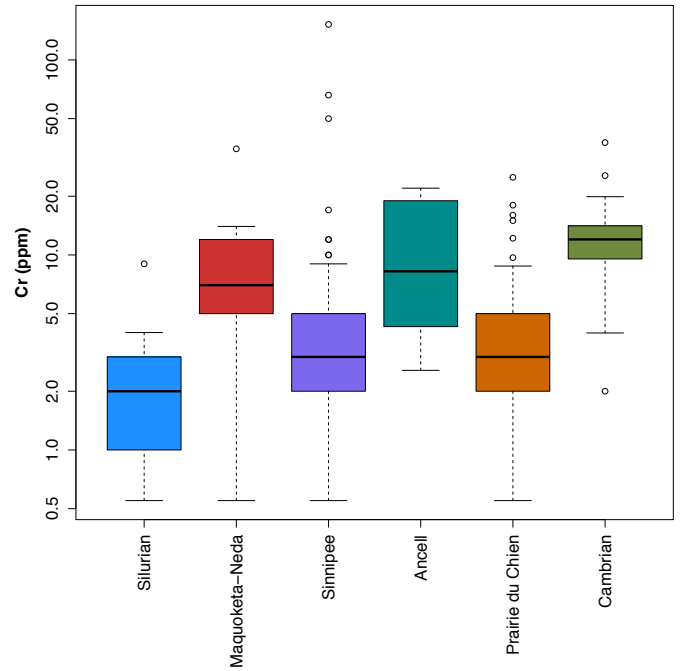

Copper - All 309 Samples

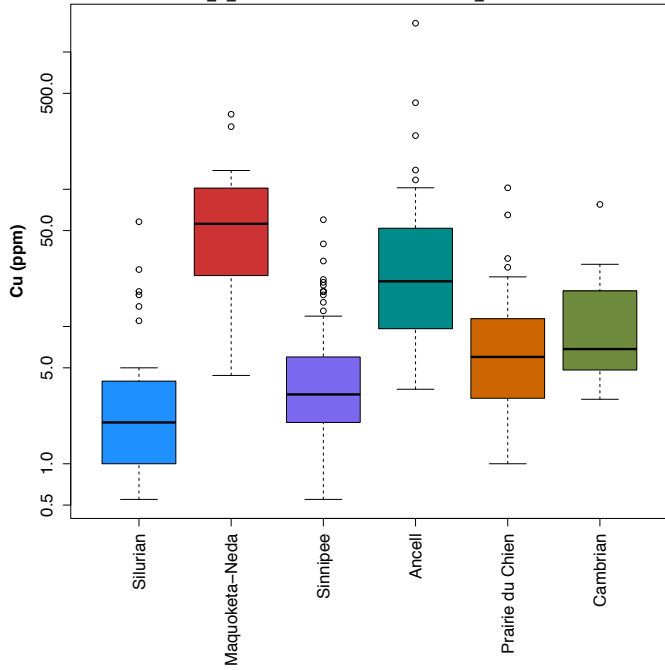

Copper - Matrix Samples Only

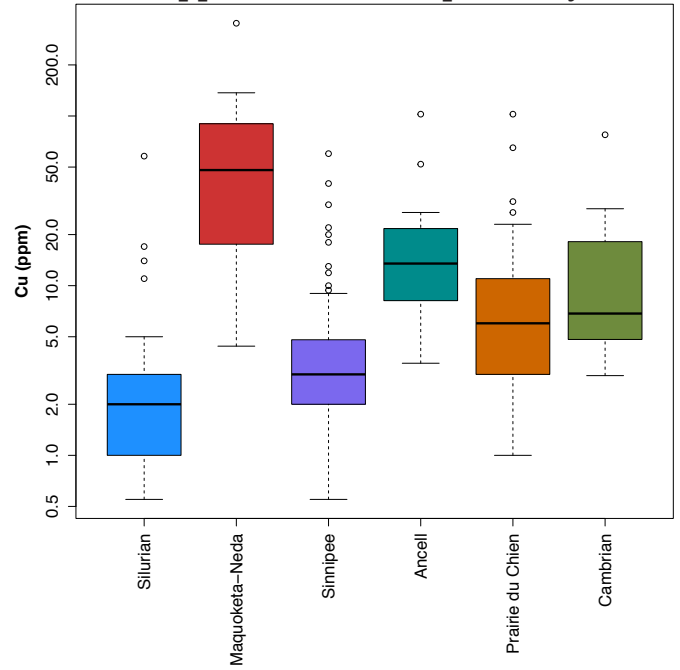

### Iron - All 309 Samples

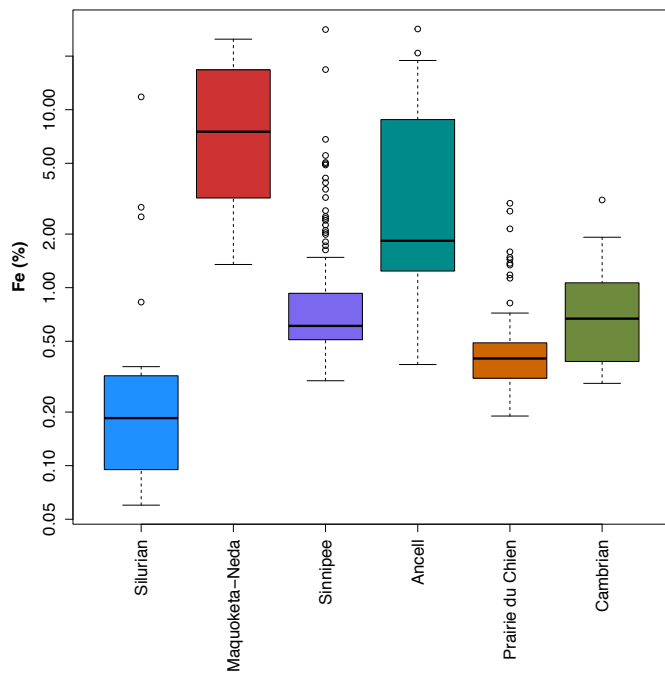

### Iron - Matrix Samples Only

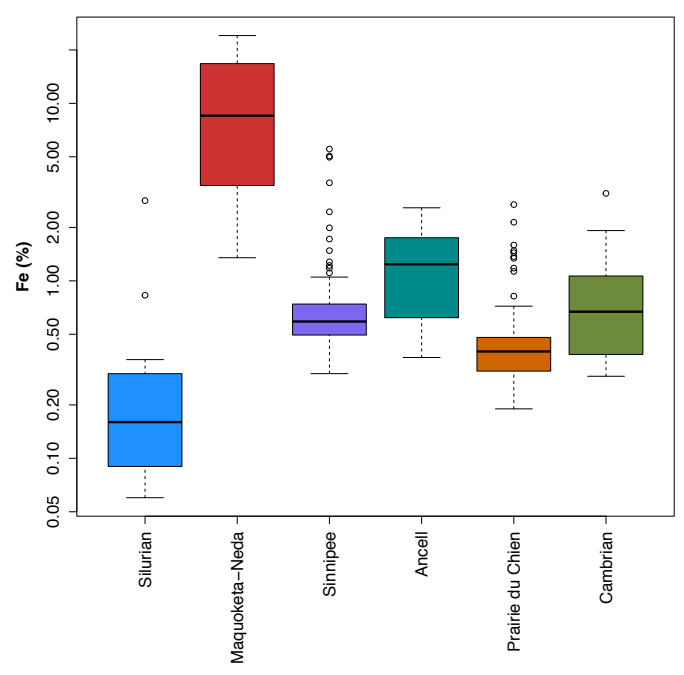

### Molybdenum - All 309 Samples

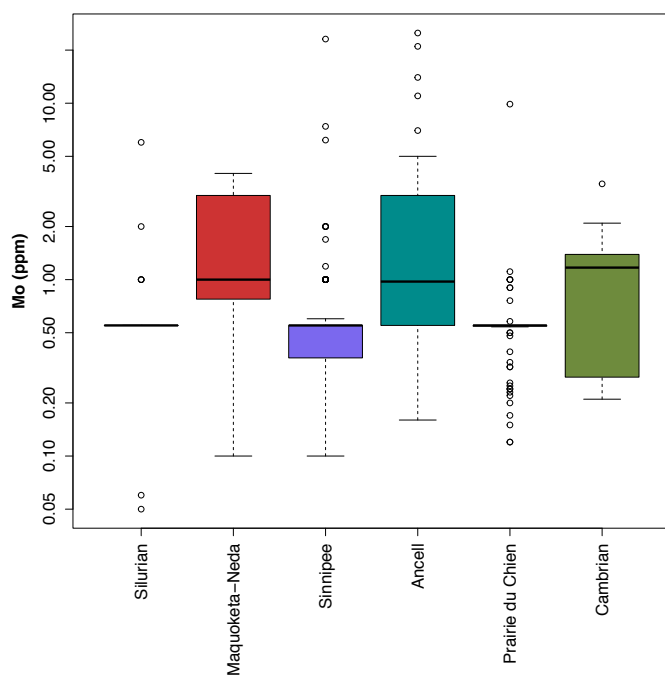

### Molybdenum - Matrix Samples Only

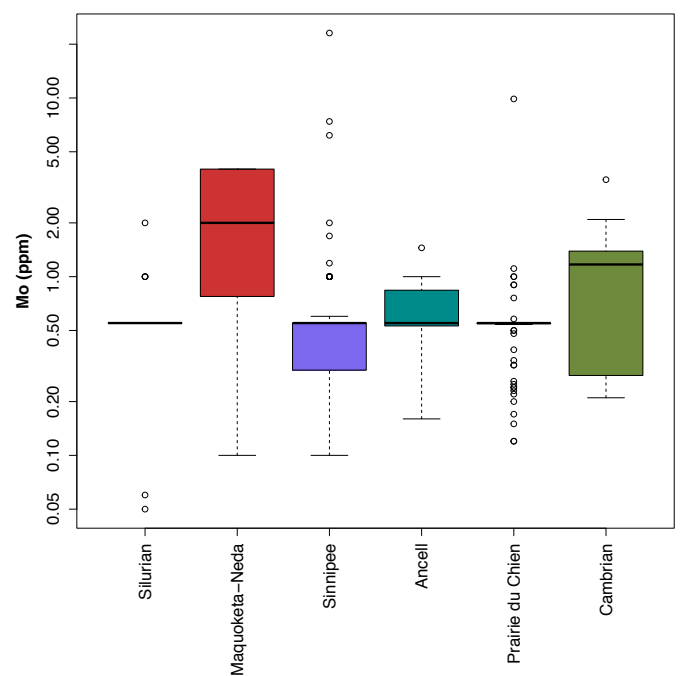

### Nickel - All 309 Samples

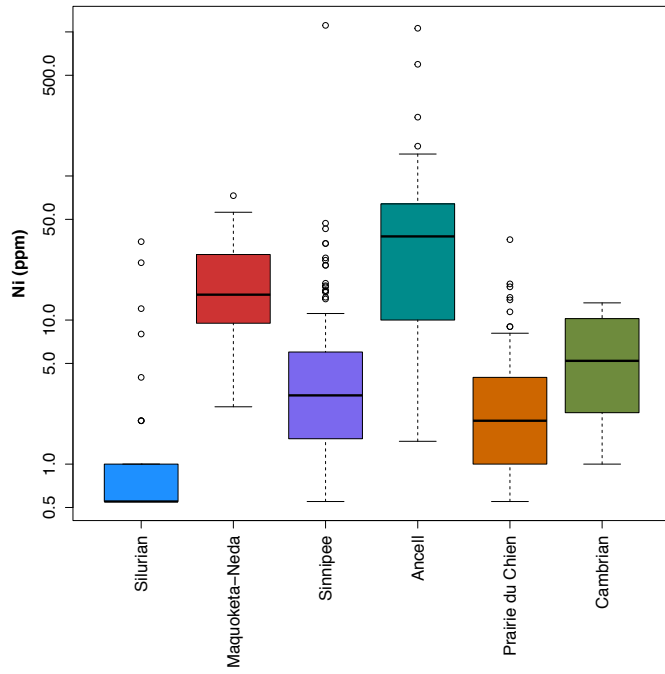

### Nickel - Matrix Samples Only

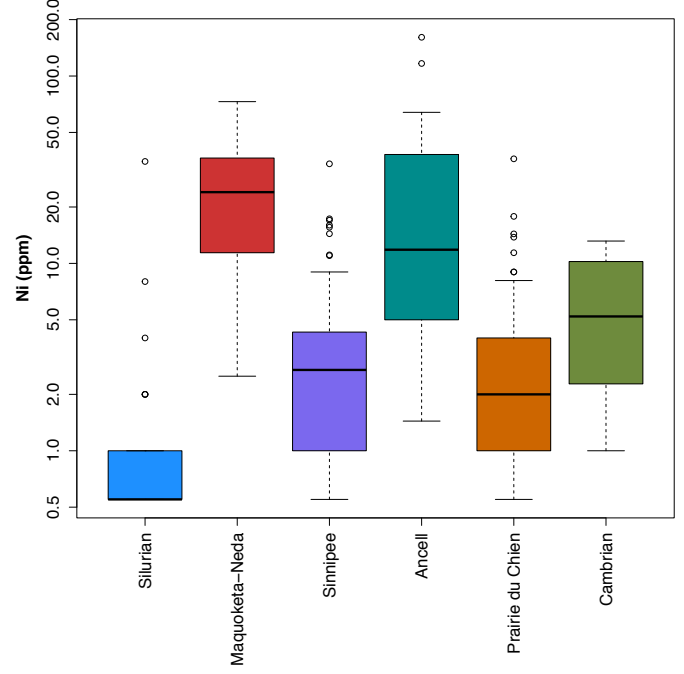

Lead - All 309 Samples

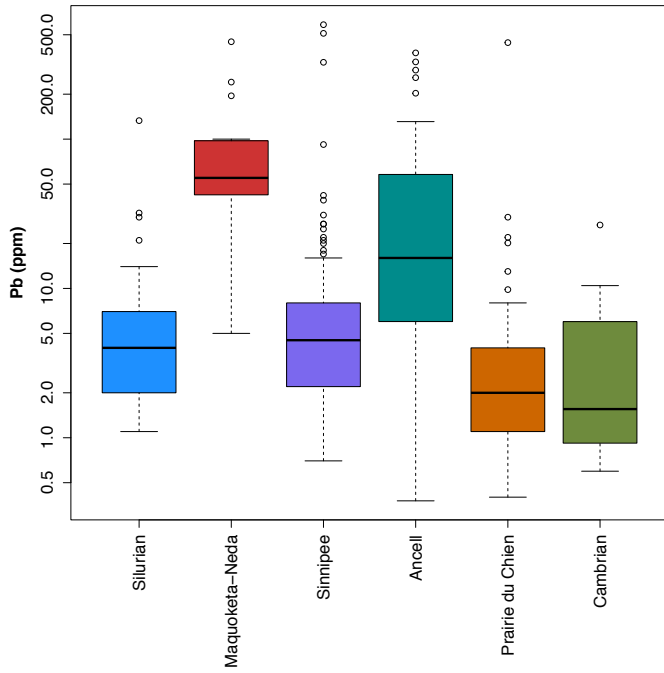

Lead - Matrix Samples Only

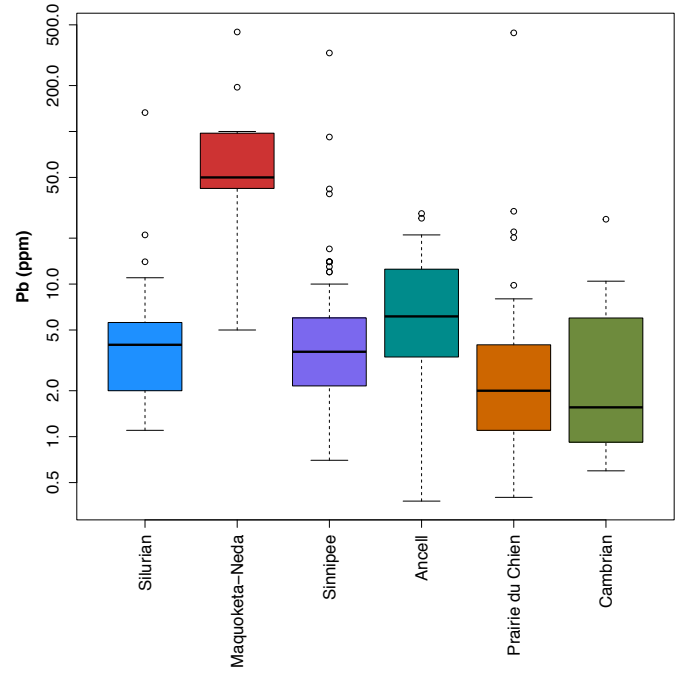

Vanadium - All 309 Samples

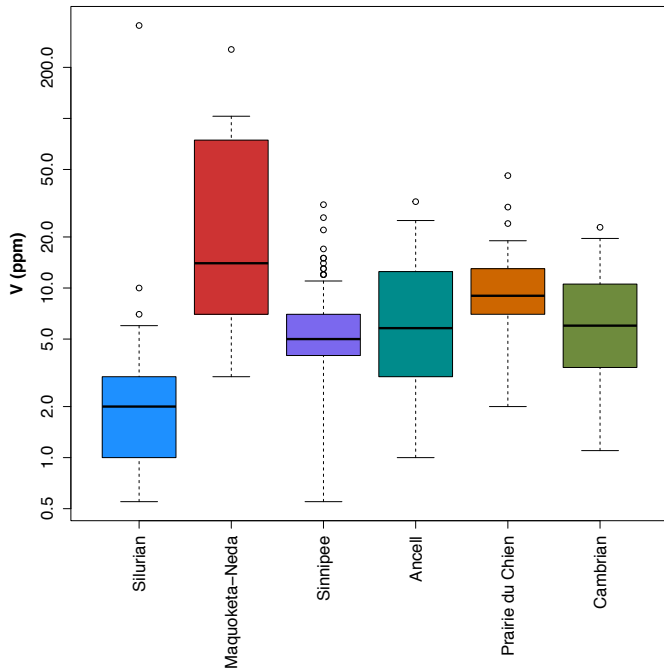

Vanadium - Matrix Samples Only

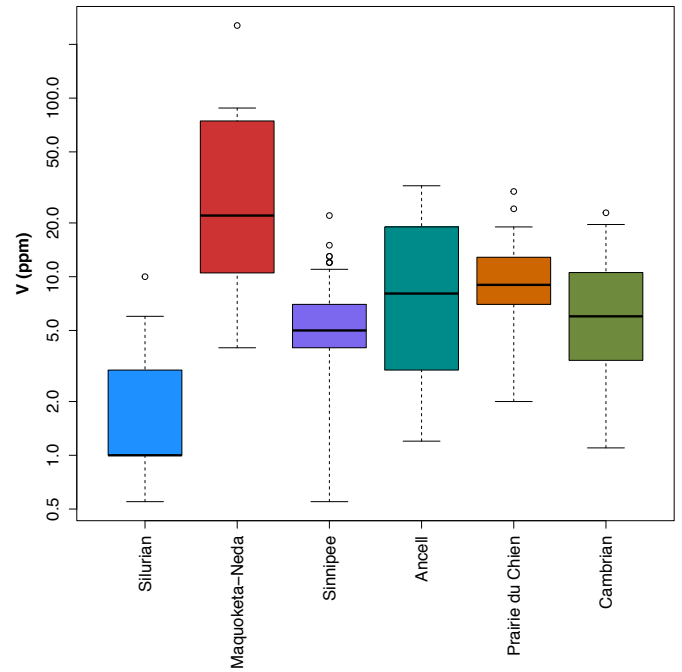

Zinc - All 309 Samples

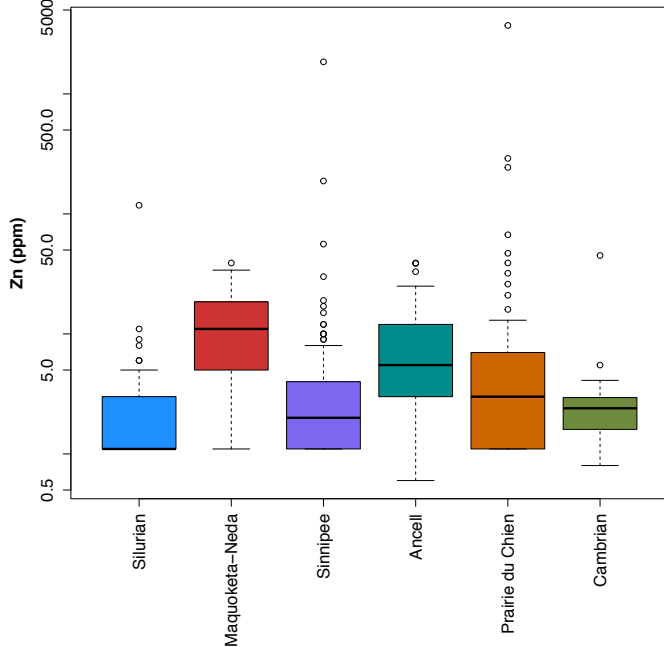

Zinc - Matrix Samples Only

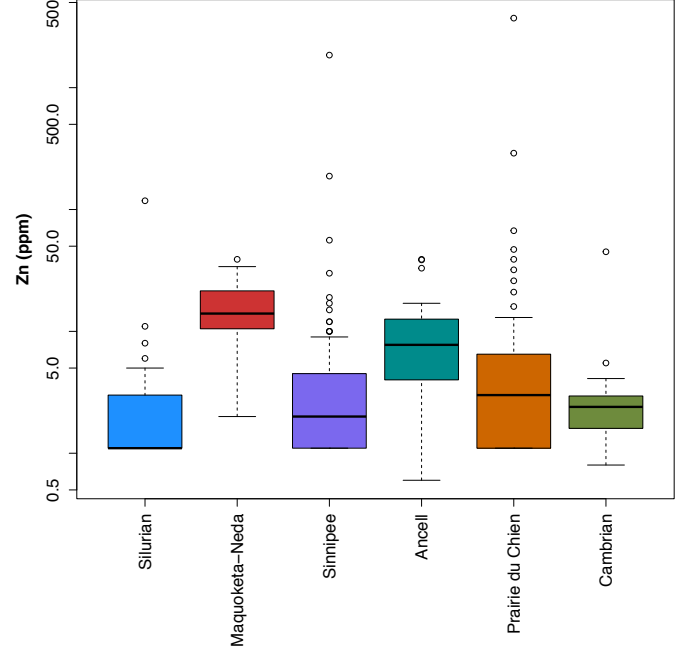

Supplement: s1 [file s1]
